# Supplementary material
Source: PubMed Central journal article supplement (PMC6727687)

## Supplementary Online Content

Jones RP, Psarelli E-E, Jackson R, et al; European Study Group for Pancreatic Cancer. Patterns of recurrence after resection of pancreatic ductal adenocarcinoma: a secondary analysis of the ESPAC-4 randomized adjuvant chemotherapy trial. *JAMA Surg*. Published online September 4, 2019. doi:10.1001/jamasurg.2019.3337

**eTable 1.** Multivariable Analysis of Overall Survival After Identification of Recurrence

**eTable 2.** Competing Risks Analysis for Local Recurrence Versus Distant Recurrence Versus Death Without Recurrence

**eFigure 1.** Postprogression Survival as Cumulative Incidence Plots From Time of Surgery

**eFigure 2.** Kaplan–Meier Curves Showing Survival from Time of Surgery

This supplementary material has been provided by the authors to give readers additional information about their work.

**eTable1. Multivariable analysis of overall survival after identification of recurrence.**

| Characteristic          |                               | Estimate (se) | Hazard ratio (95% CI) | P      |
|-------------------------|-------------------------------|---------------|-----------------------|--------|
| Resection margin        | Negative                      |               |                       |        |
|                         | Positive                      | 0.33 (0.116)  | 1.39 (1.106, 1.744)   | 0.005  |
| Tumor grade             | Poor                          | Reference     |                       |        |
|                         | Moderate                      | -0.67 (0.116) | 0.51 (0.406, 0.64)    | <0.001 |
|                         | Well                          | -0.75 (0.225) | 0.47 (0.303, 0.732)   | <0.001 |
| Local invasion          | No                            | Reference     |                       |        |
|                         | Yes                           | 0.23 (0.108)  | 1.26 (1.018, 1.554)   | 0.034  |
| Smoking status          | Never                         | Reference     |                       |        |
|                         | Past                          | 0.11 (0.121)  | 1.11 (0.878, 1.41)    | 0.38   |
|                         | Present                       | 0.38 (0.15)   | 1.46 (1.087, 1.957)   | 0.012  |
| Site of recurrence      | Local                         | Reference     |                       |        |
|                         | Distant                       | -0.21 (0.111) | 0.81 (0.649, 1.004)   | 0.054  |
| Pre-operative CRP level |                               | 0.2 (0.055)   | 1.22 (1.095, 1.361)   | <0.001 |
| Treatment arm           | Gemcitabine                   | Reference     |                       |        |
|                         | Gemcitabine plus capecitabine | -0.23 (0.11)  | 0.79 (0.64, 0.982)    | 0.034  |

**eTable 2. Competing risks analysis for local recurrence versus distant recurrence versus death without recurrence. Where boxes are blank, the factor did not reach significance on univariate modeling for inclusion in the competing risks model.**

| Characteristic       |                               | Local Recurrence |                       |            | Distant Recurrence |                       |            | Death Without Recurrence |                       |            |
|----------------------|-------------------------------|------------------|-----------------------|------------|--------------------|-----------------------|------------|--------------------------|-----------------------|------------|
|                      |                               | Est (se)         | 95% CI                | P          | Est (se)           | 95% CI                | P          | Est (se)                 | 95% CI                | P          |
| N stage              | 0                             | Reference        |                       |            |                    |                       |            |                          |                       |            |
|                      | 1                             | 0.56 (0.206)     | 1.76<br>(1.174,2.633) | 0.006      | 0.34<br>(0.201)    | 1.41<br>(0.95,2.092)  | 0.09       | 0.53<br>(0.387)          | 1.7<br>(0.797,3.638)  | 0.17       |
|                      | 2                             | 1.03 (0.211)     | 2.81<br>(1.859,4.258) | <0.00<br>1 | 0.77<br>(0.206)    | 2.16<br>(1.443,3.229) | <0.00<br>1 | 1.14<br>(0.391)          | 3.13<br>(1.456,6.737) | 0.003      |
| Maximum Tumour Size  |                               | 0.12 (0.057)     | 1.12<br>(1.005,1.255) | 0.04       |                    |                       |            |                          |                       |            |
| R Status             | Negative                      | Reference        |                       |            |                    |                       |            |                          |                       |            |
|                      | Positive                      | 0.17 (0.142)     | 1.19 (0.899,<br>.566) | 0.23       | -0.01<br>(0.136)   | 0.99<br>(0.755,1.287) | 0.92       | 0.21<br>(0.248)          | 1.23<br>(0.759,2.005) | 0.4        |
| Treatment Allocation | Gemcitabine                   | Reference        |                       |            |                    |                       |            |                          |                       |            |
|                      | Gemcitabine plus Capecitabine | -0.27 (0.132)    | 0.77<br>(0.592,0.992) | 0.043      | 0.01<br>(0.129)    | 1.01<br>(0.782,1.295) | 0.96       | -0.3<br>(0.229)          | 0.74<br>(0.473,1.161) | 0.19       |
| Pre Op. CA19.9       |                               |                  |                       |            | 0.28<br>(0.046)    | 1.32<br>(1.207,1.443) | <0.00<br>1 | 0.35<br>(0.072)          | 1.41<br>(1.226,1.628) | <0.00<br>1 |

|                        |                           |           |  |  |                  |                       |        |  |  |  |
|------------------------|---------------------------|-----------|--|--|------------------|-----------------------|--------|--|--|--|
| Tumour Differentiation | Poorly/Undifferentiated   | Reference |  |  |                  |                       |        |  |  |  |
|                        | Moderately Differentiated |           |  |  | -0.53<br>(0.259) | 0.59<br>(0.355,0.982) | 0.043  |  |  |  |
|                        | Well Differentiated       |           |  |  | -0.49<br>(0.136) | 0.61<br>(0.468,0.798) | <0.001 |  |  |  |

**eFigure 1. Post progression survival as cumulative incidence plots from time of surgery.**

**(a) Local vs. distant recurrence vs. death without recurrence.**

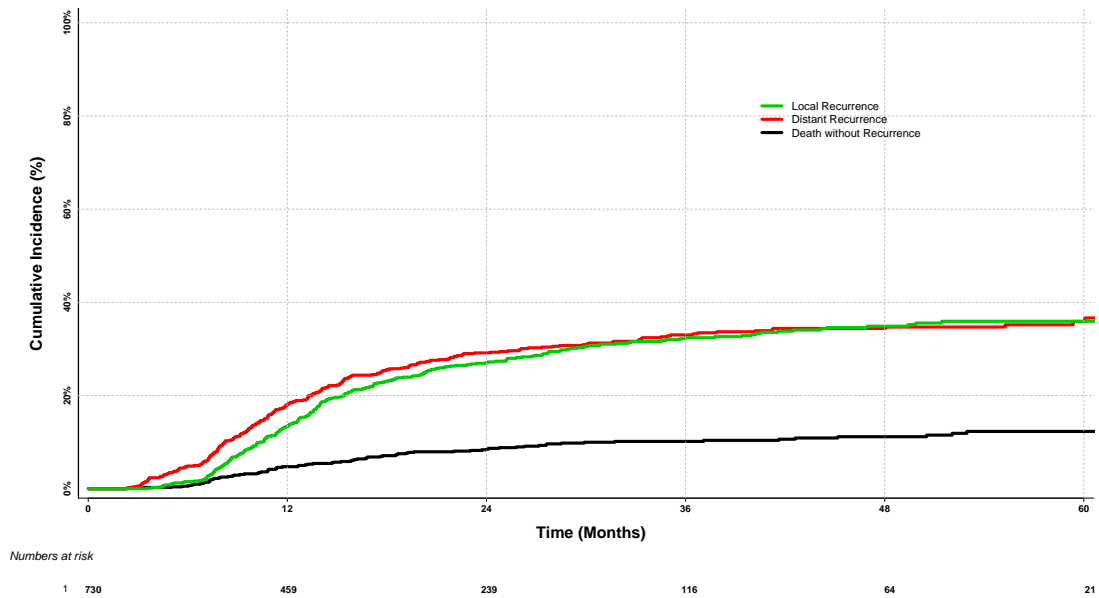

**(b) Site of distant recurrence by organ.**

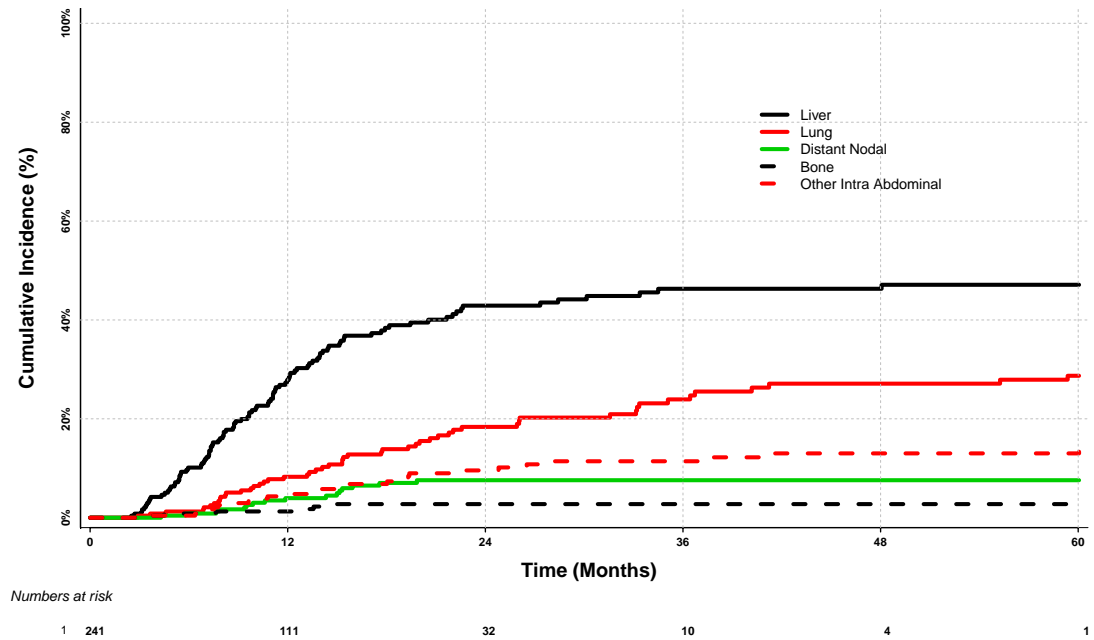

eFigure2. Kaplan – Meier curves showing survival from time of surgery.

(a) Recurrence stratified by local versus distant disease.

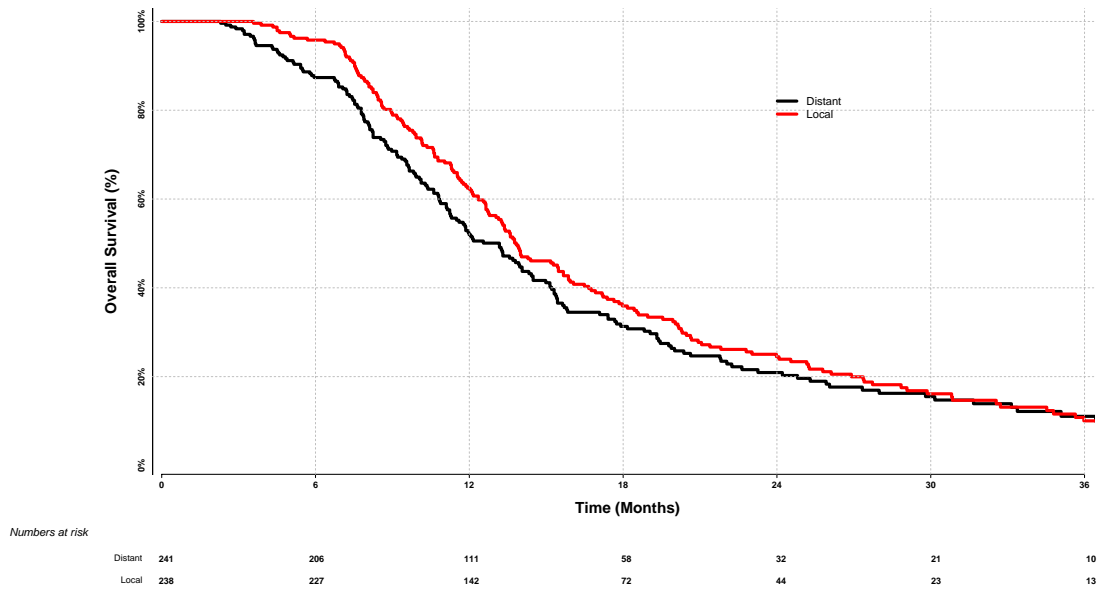

(b) Recurrence stratified by organ of recurrence.

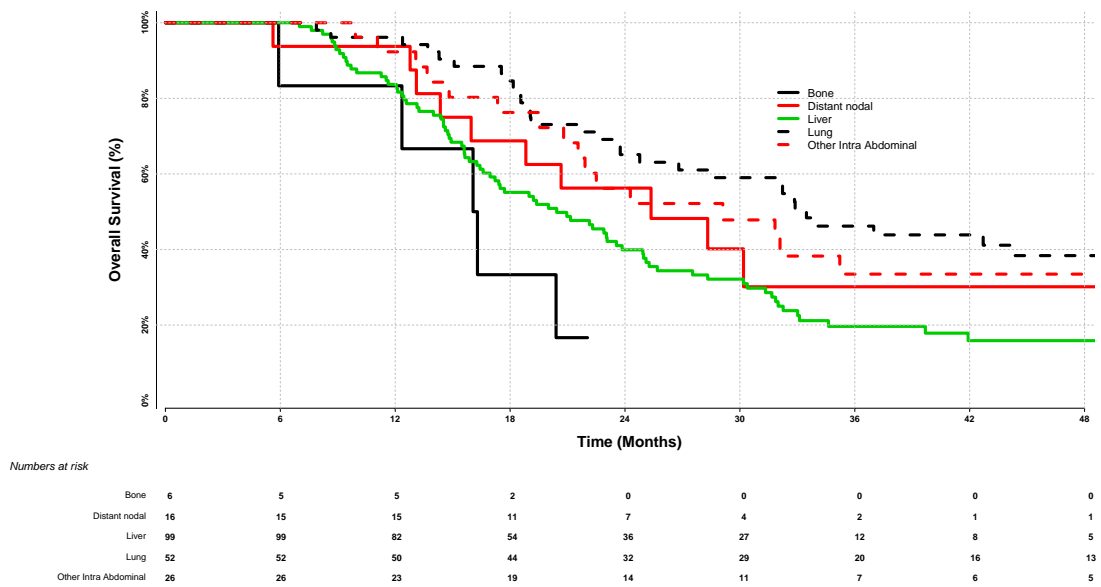

Supplement: jamasurg-154-1038-s001.pdf [file jamasurg-154-1038-s001.pdf]
